# Supplementary material for: Long intervals between repetitive concussions reduce risk of cognitive impairment and limit microglial activation, astrogliosis, and tauopathy in adolescent rats
Source: Research Square preprint supplement (doi:10.21203/rs.3.rs-6815160/v1), 2025-06-12
Supplement: Supplementary file 1 [file 014c651dab18590dd7abbe5c.pdf]

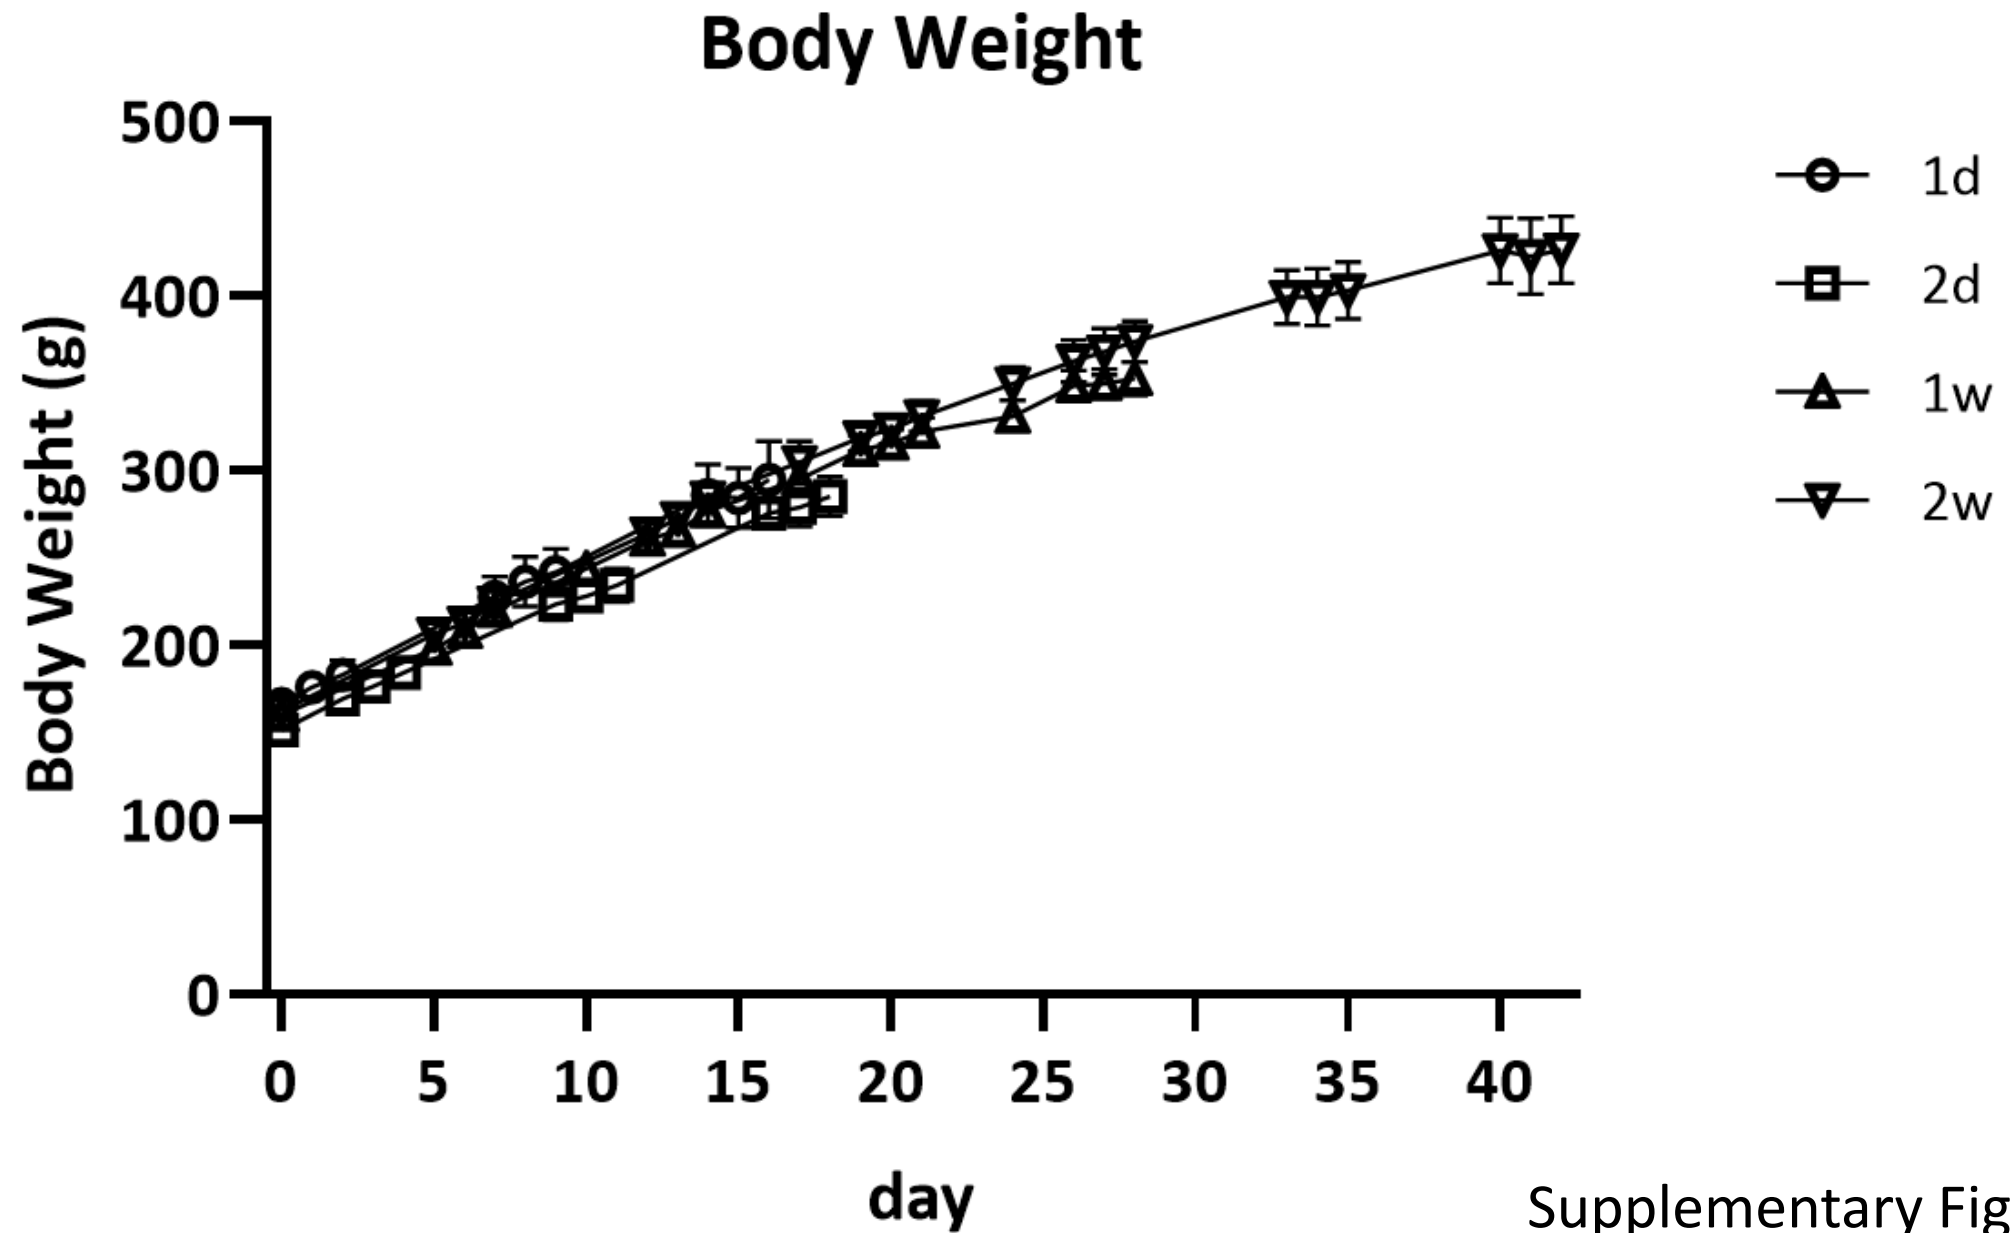

Supplementary Figure S1

# modified Neurological Severity Score

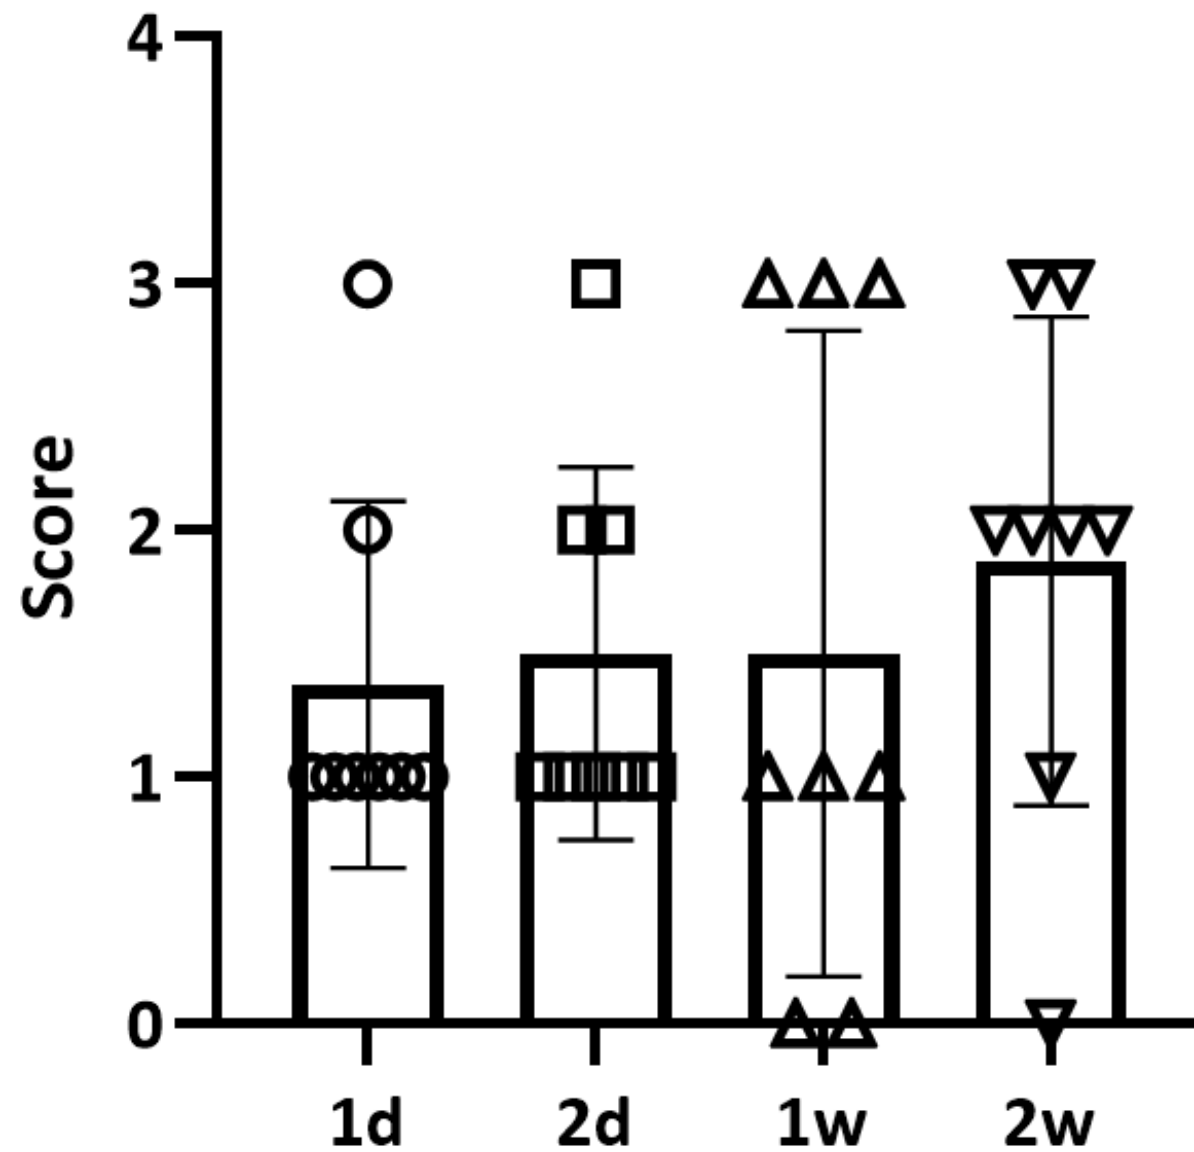

Supplementary Figure S2

Beam Walking Test  
3cm width

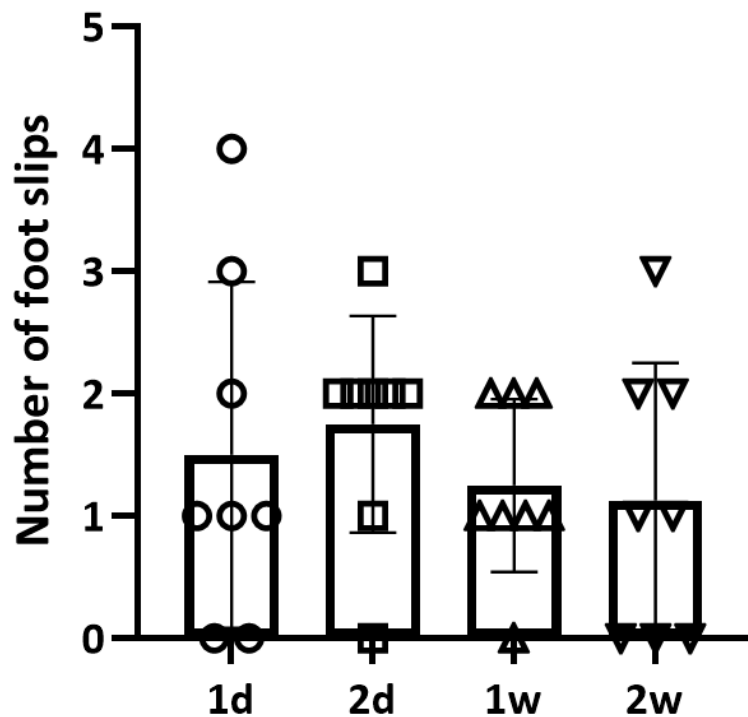

Beam Walking Test  
2cm width

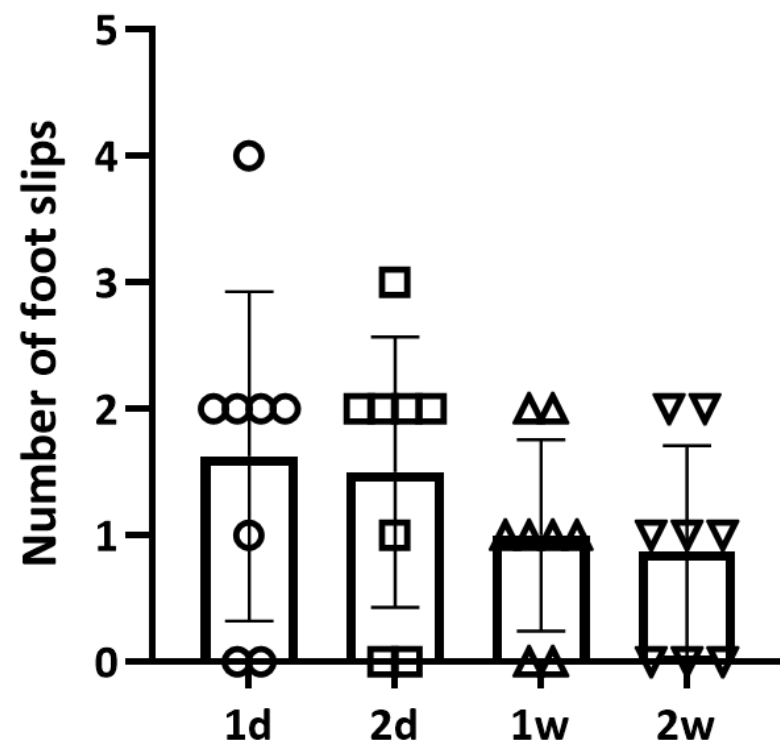

Beam Walking Test  
1cm width

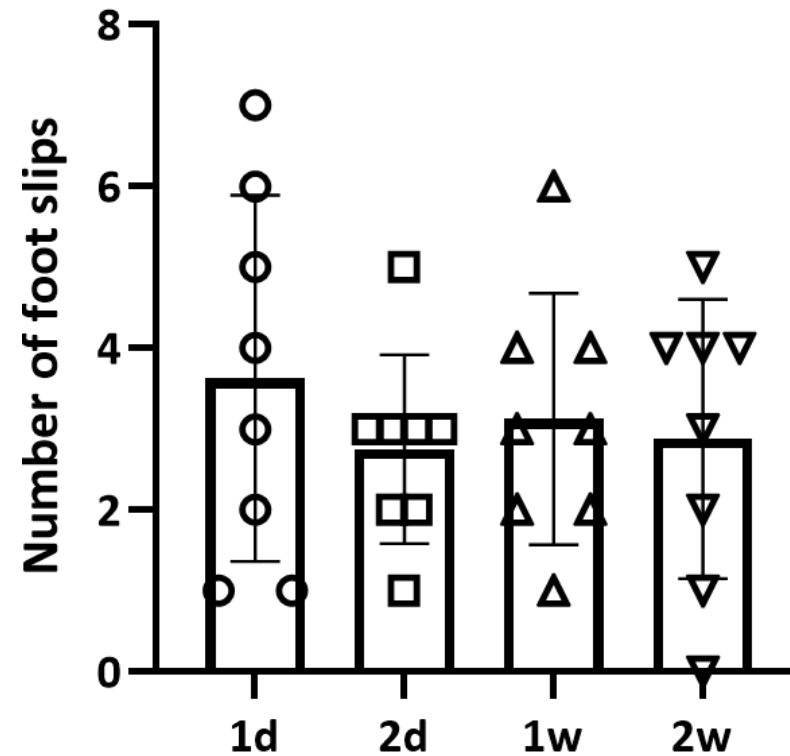

Supplementary Figure S3

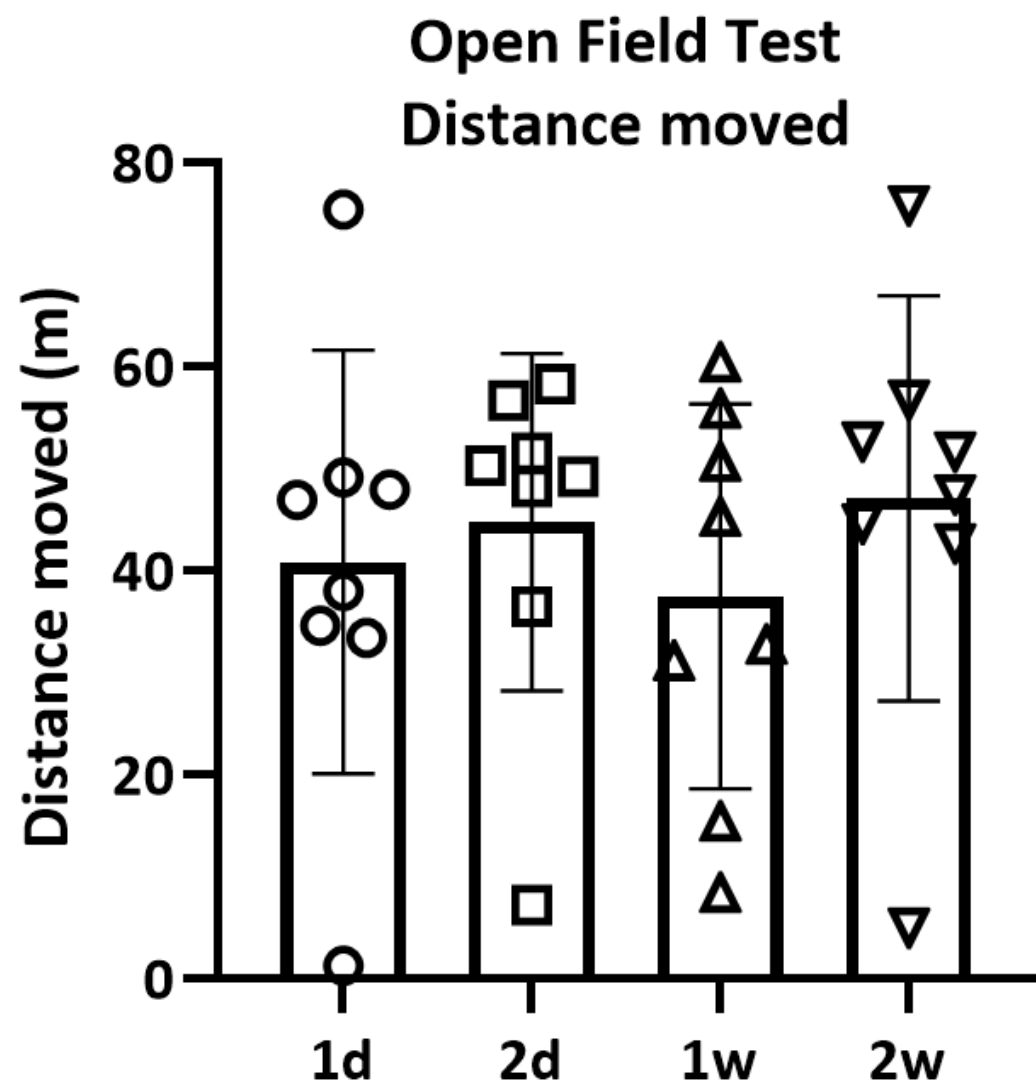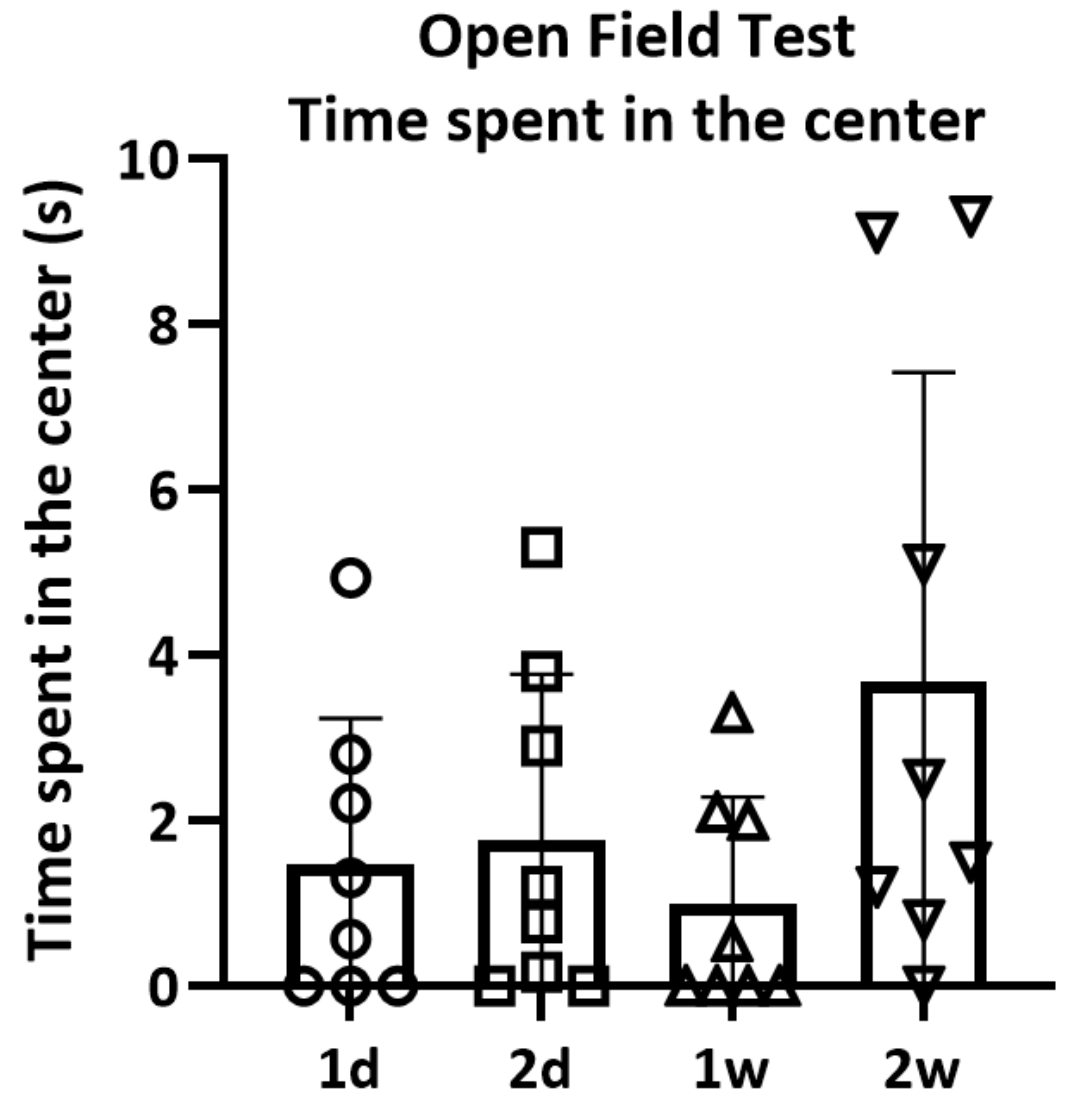

Supplementary Figure S4

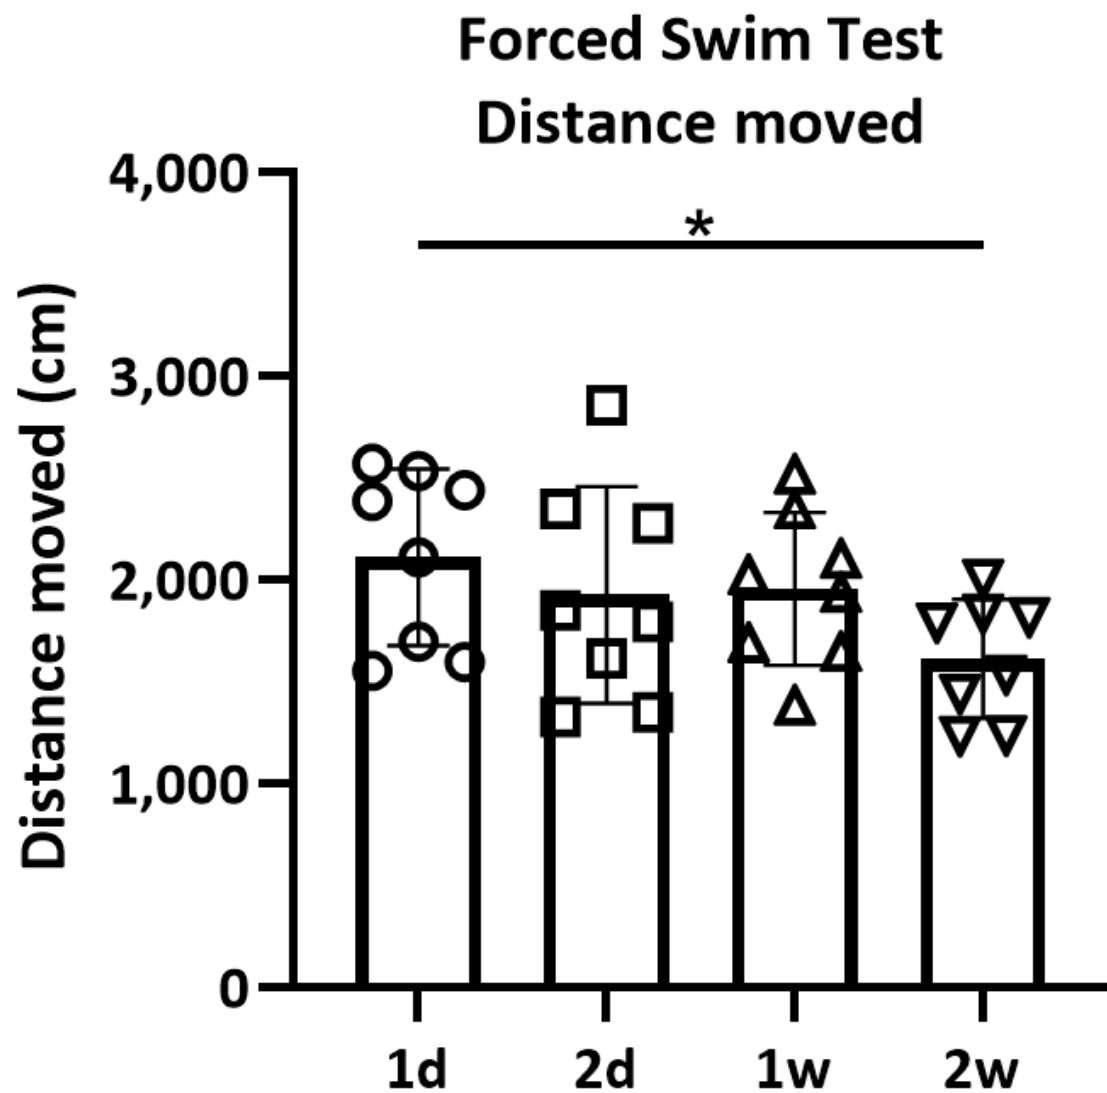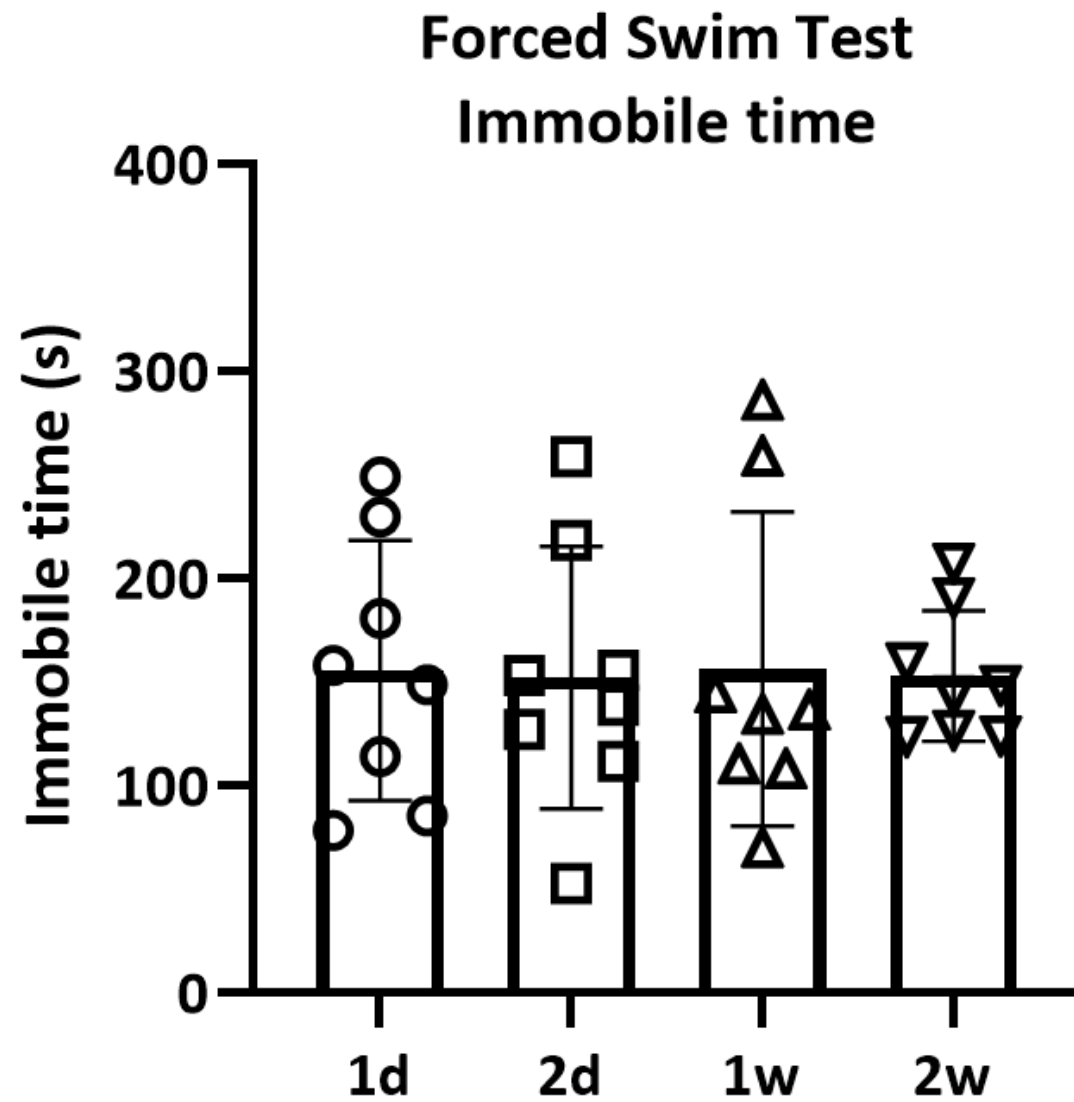

Supplementary Figure S5

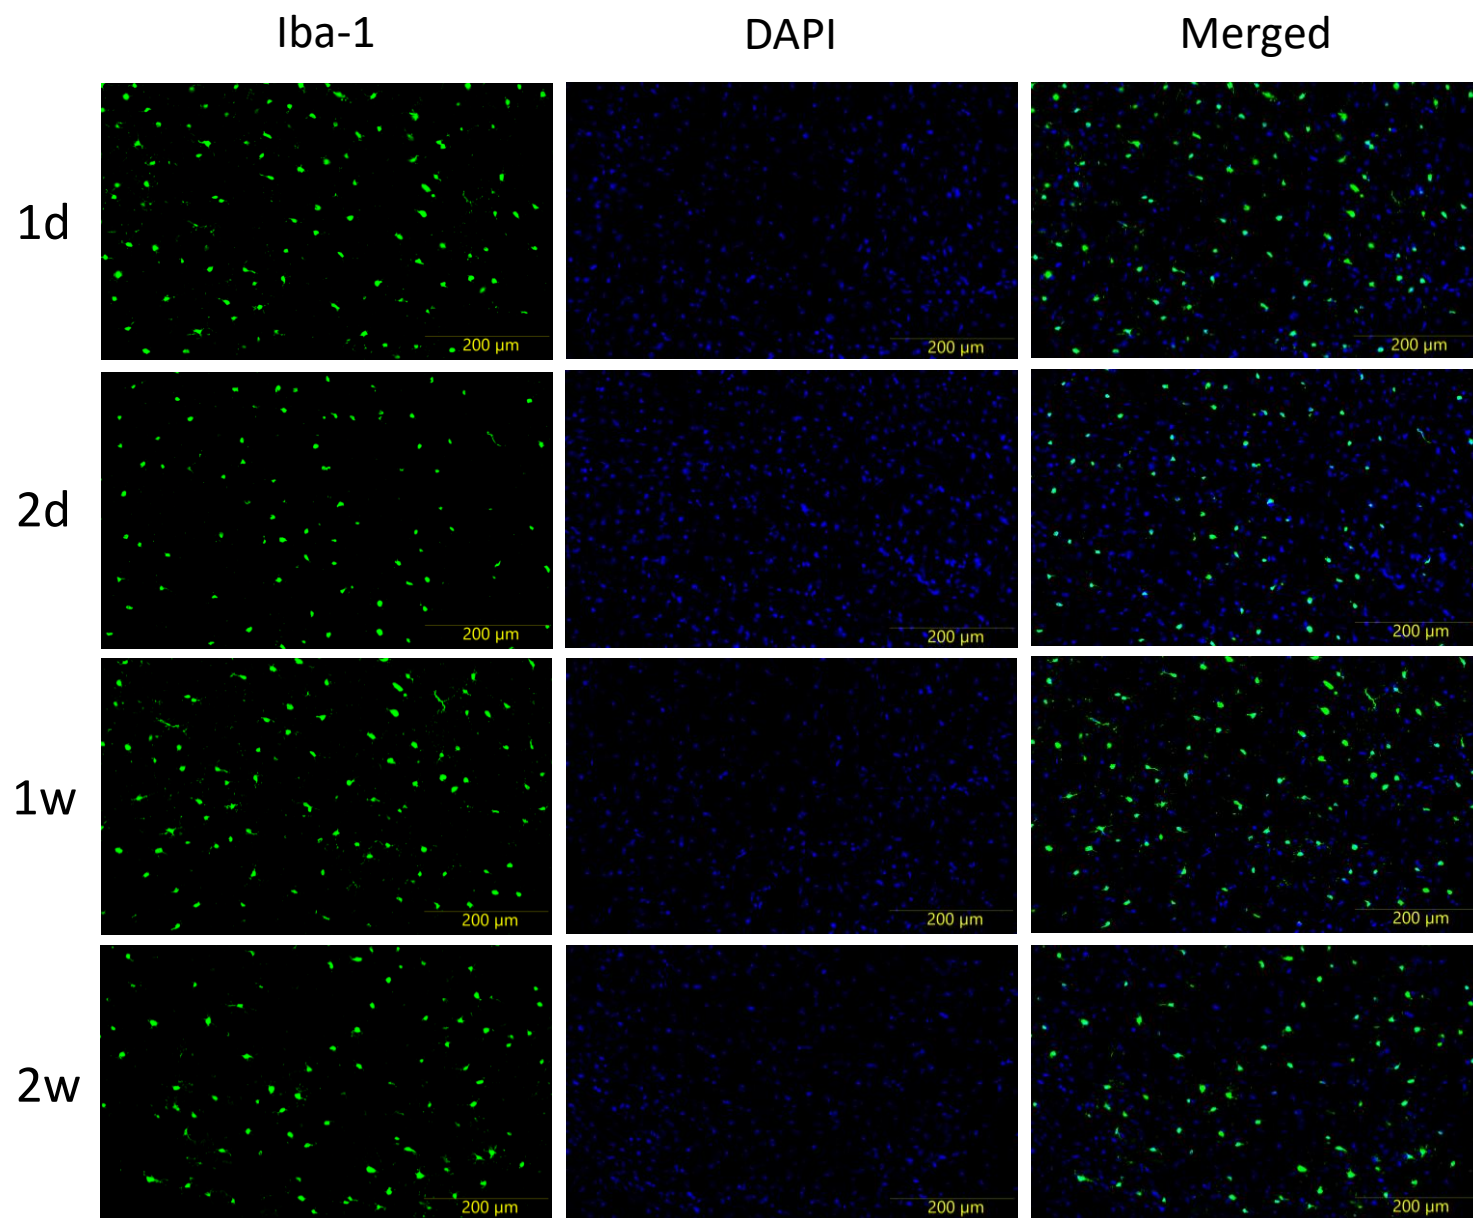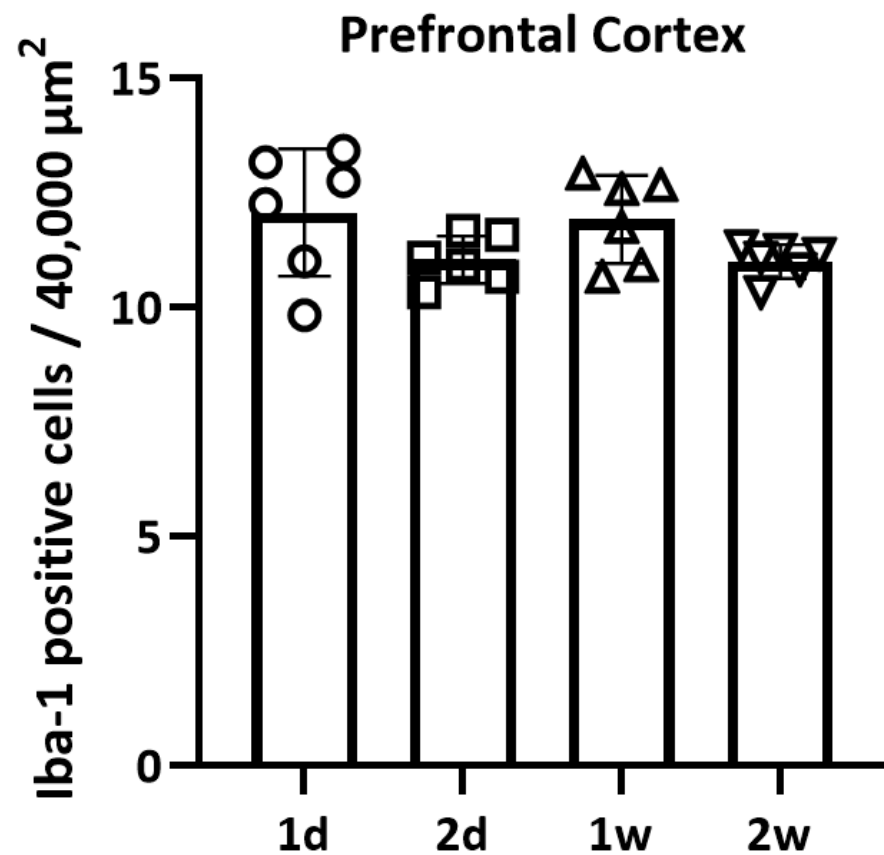

Supplementary Figure S6

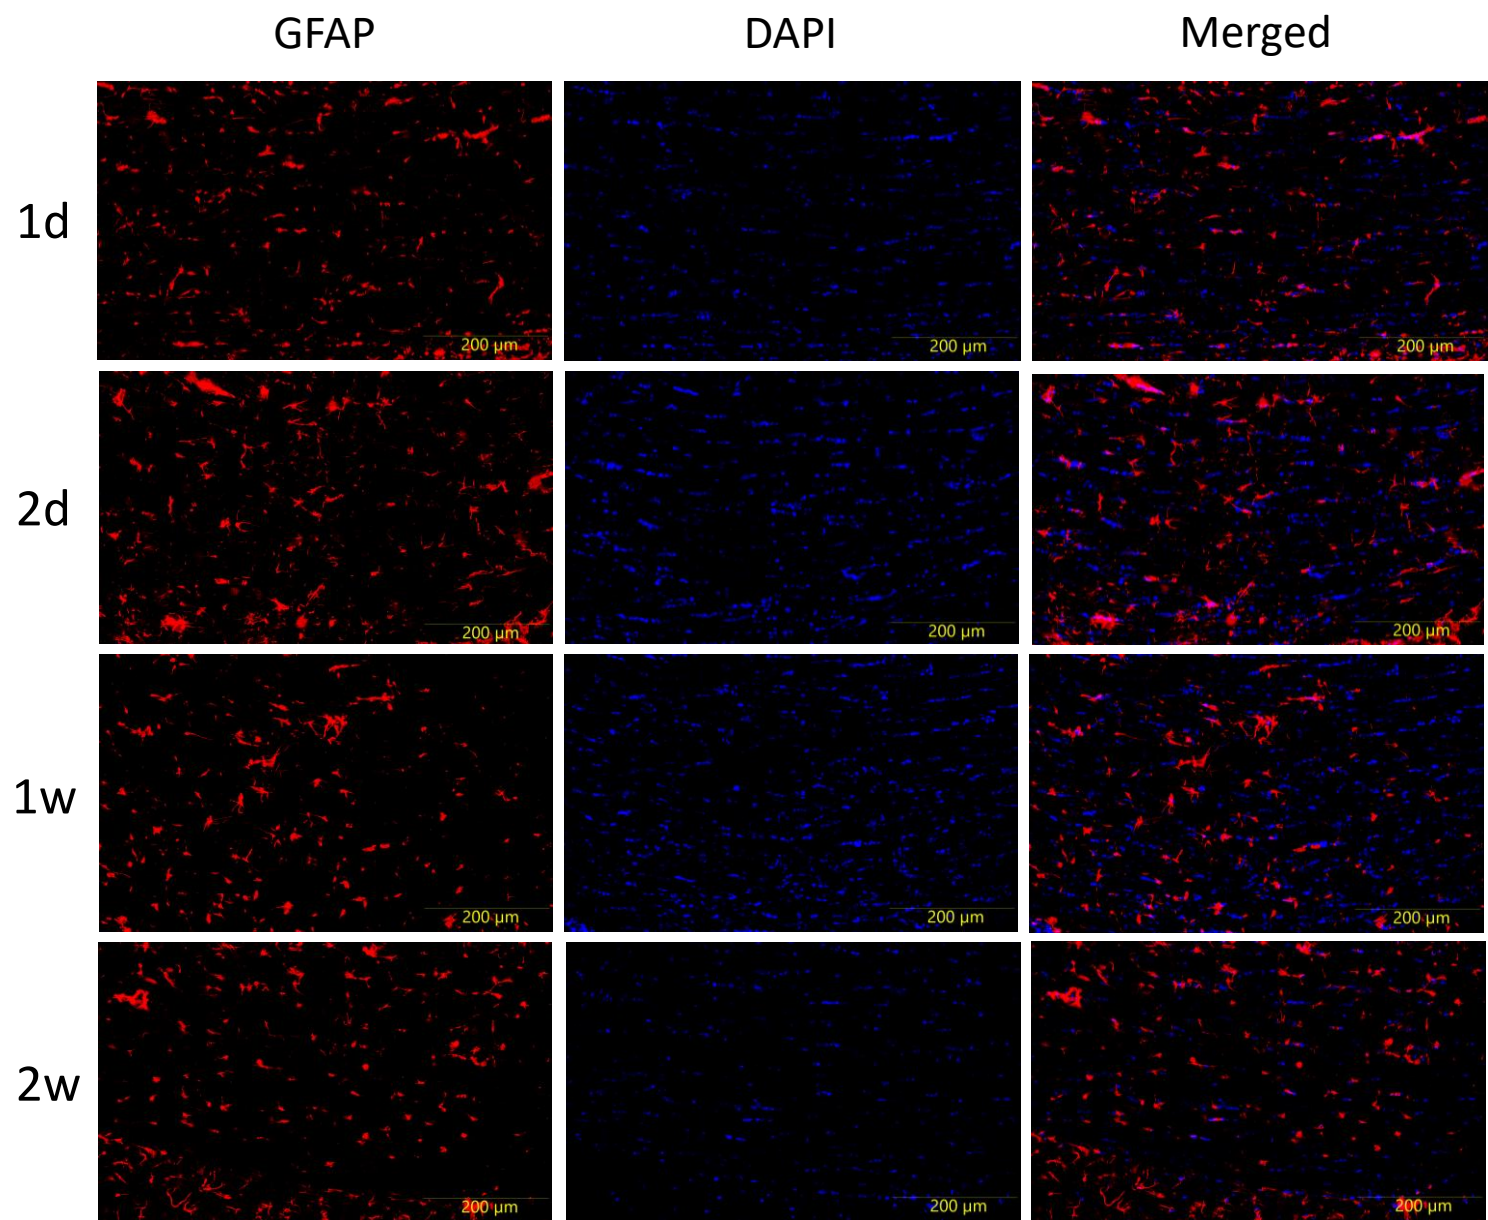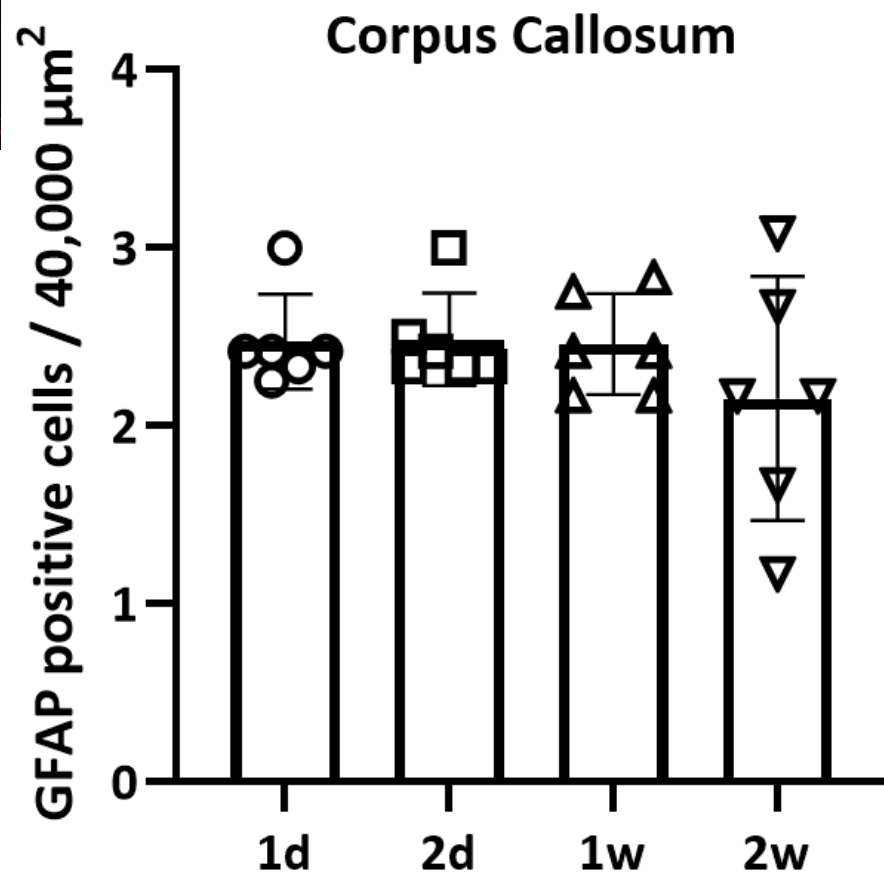

Supplementary Figure S7



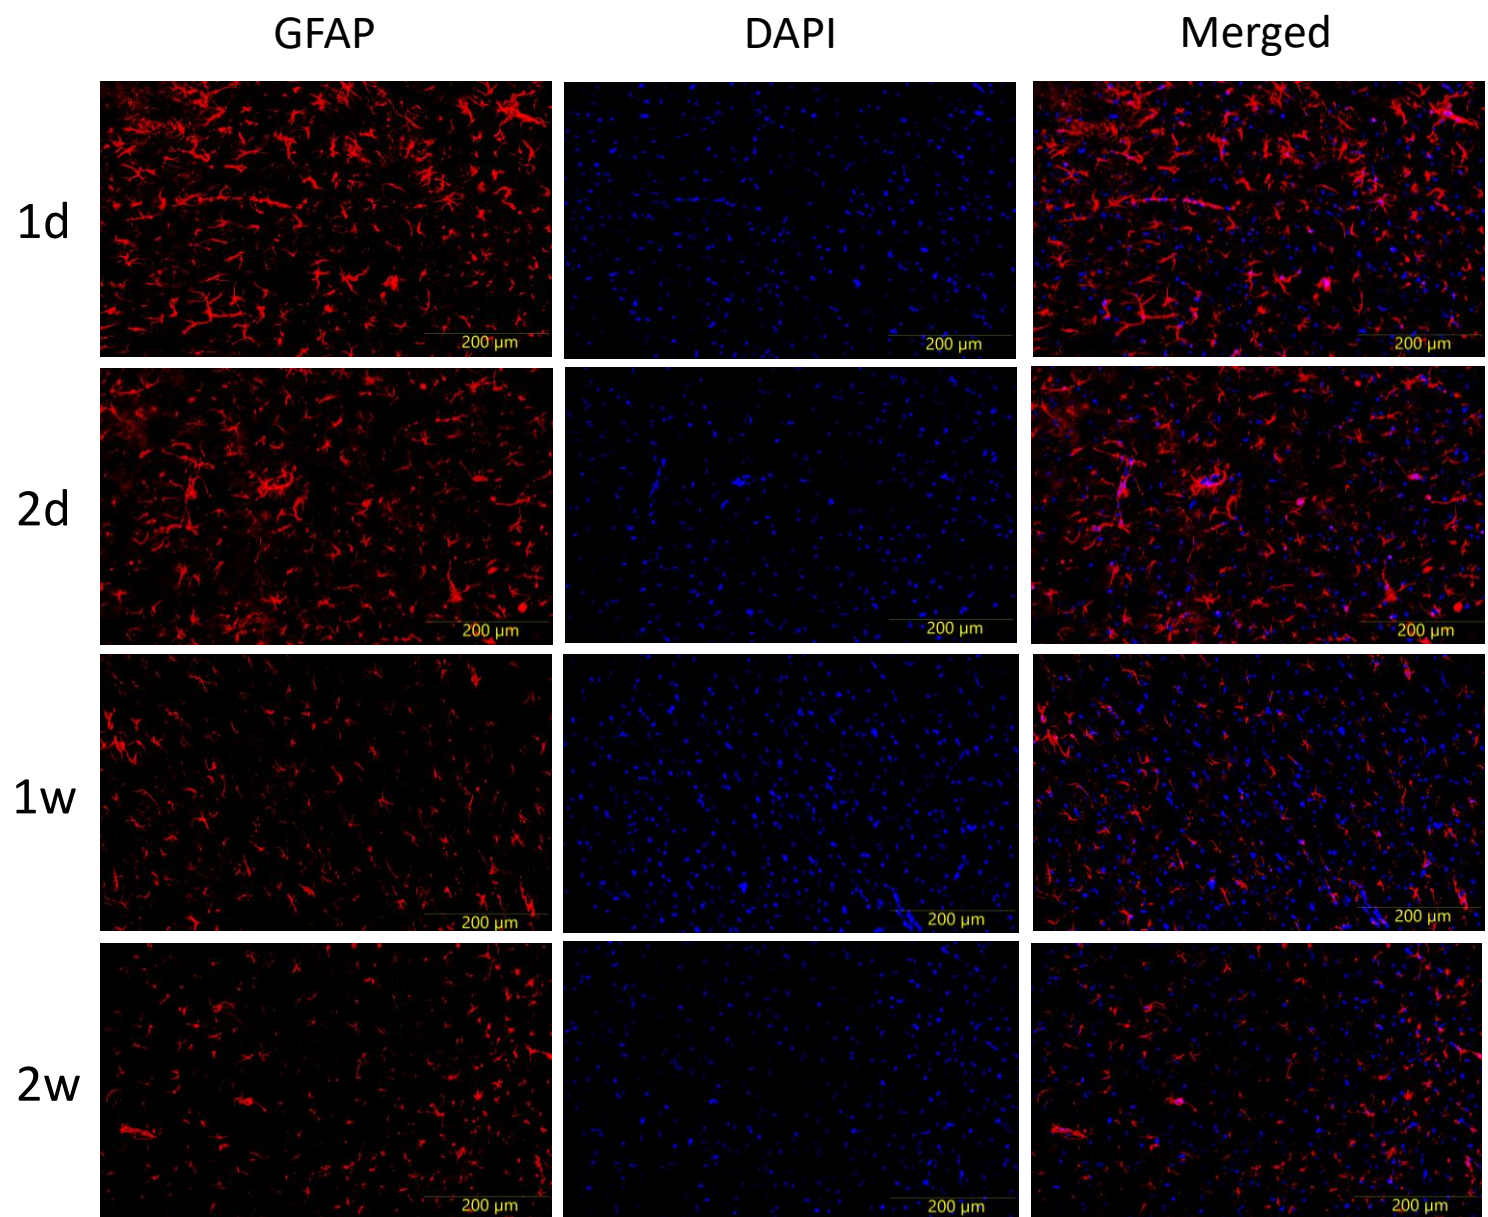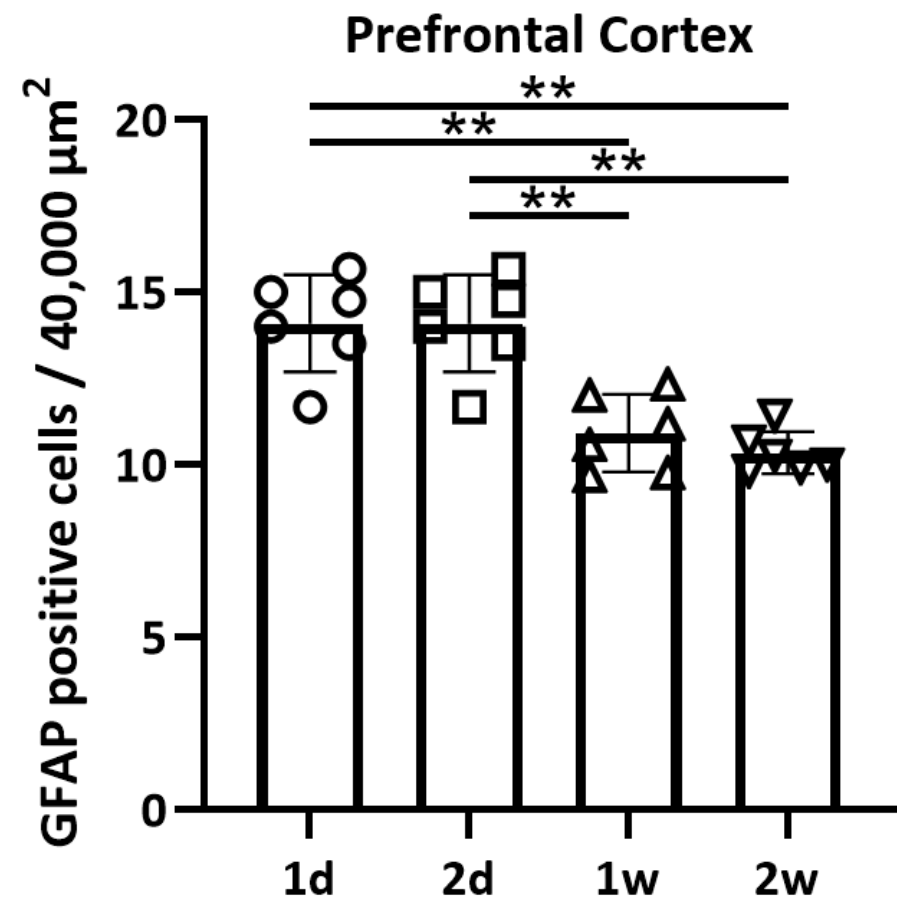

Supplementary Figure S8



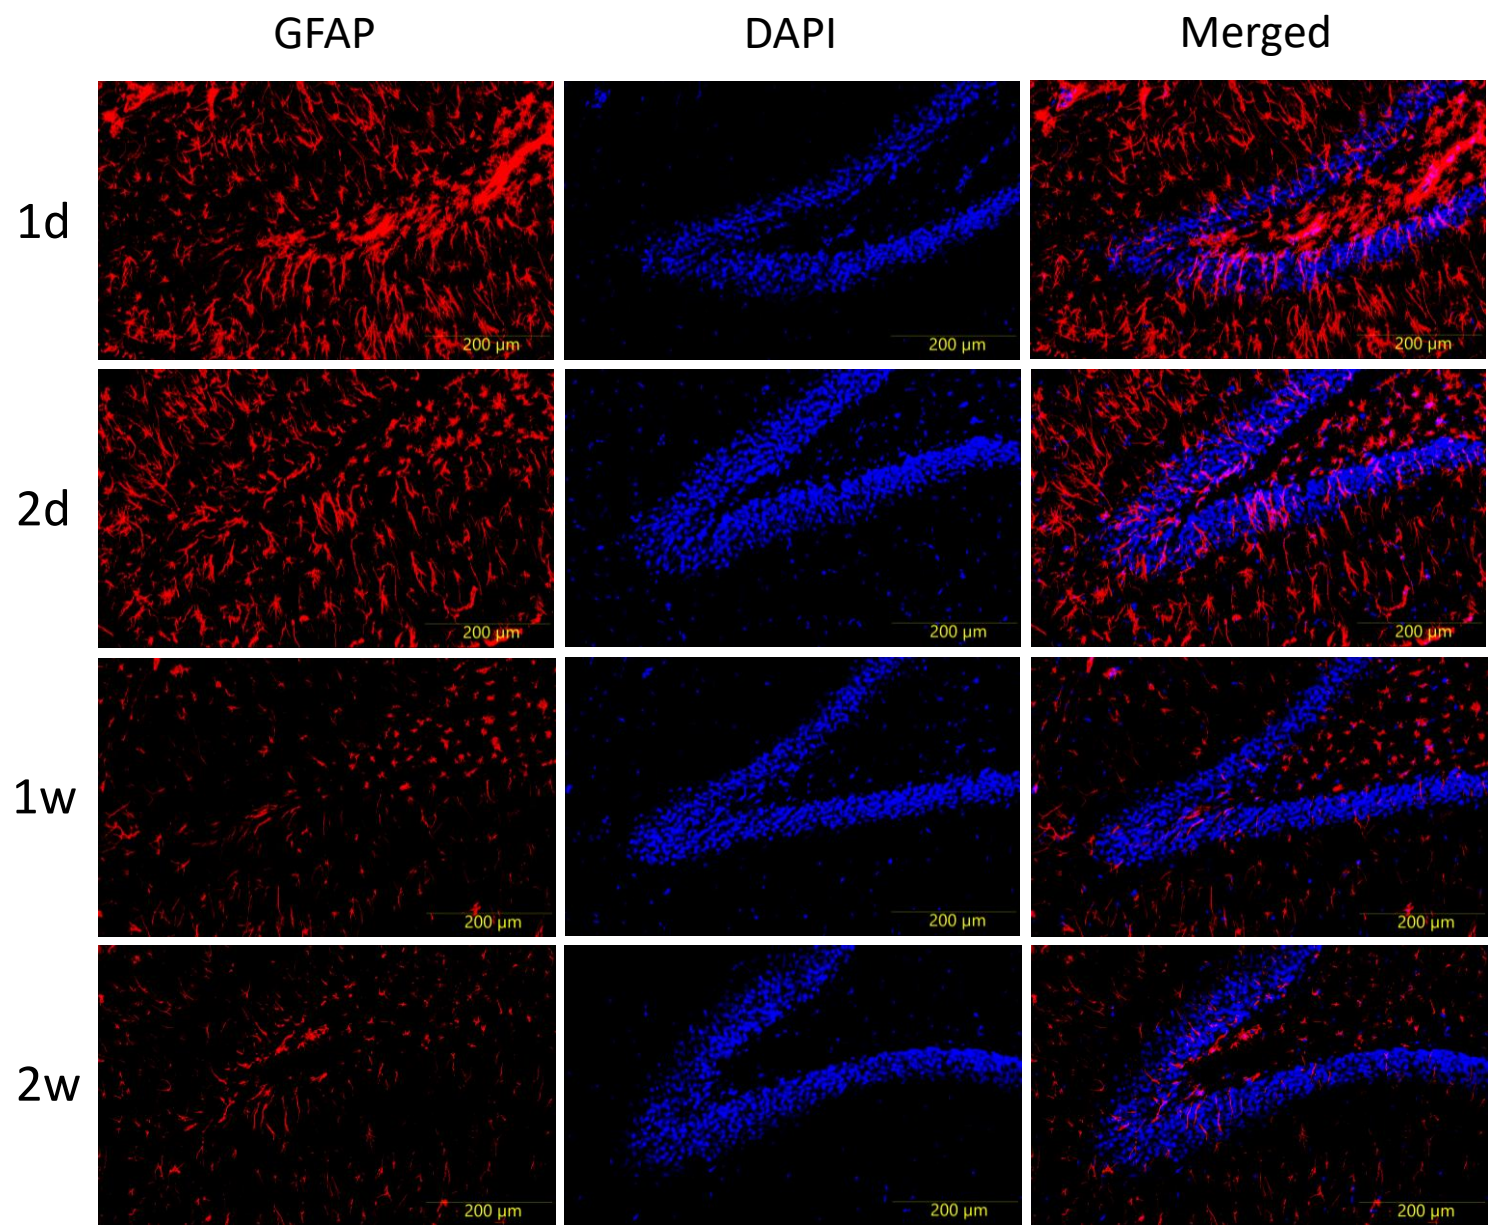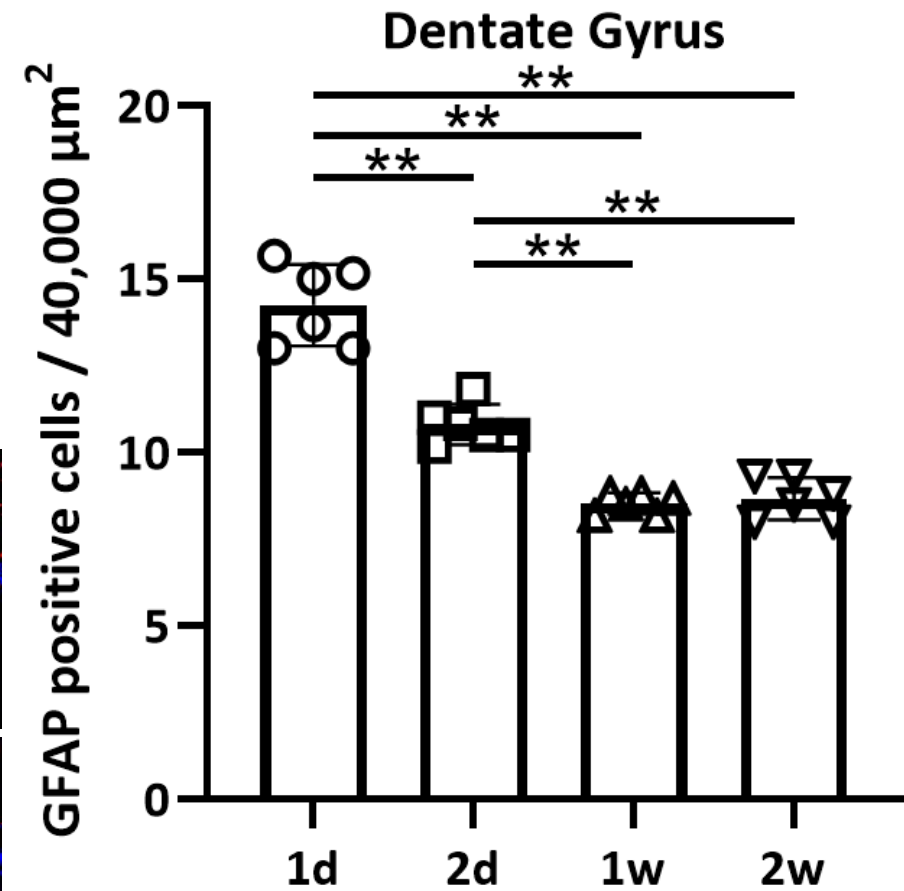

Supplementary Figure S9

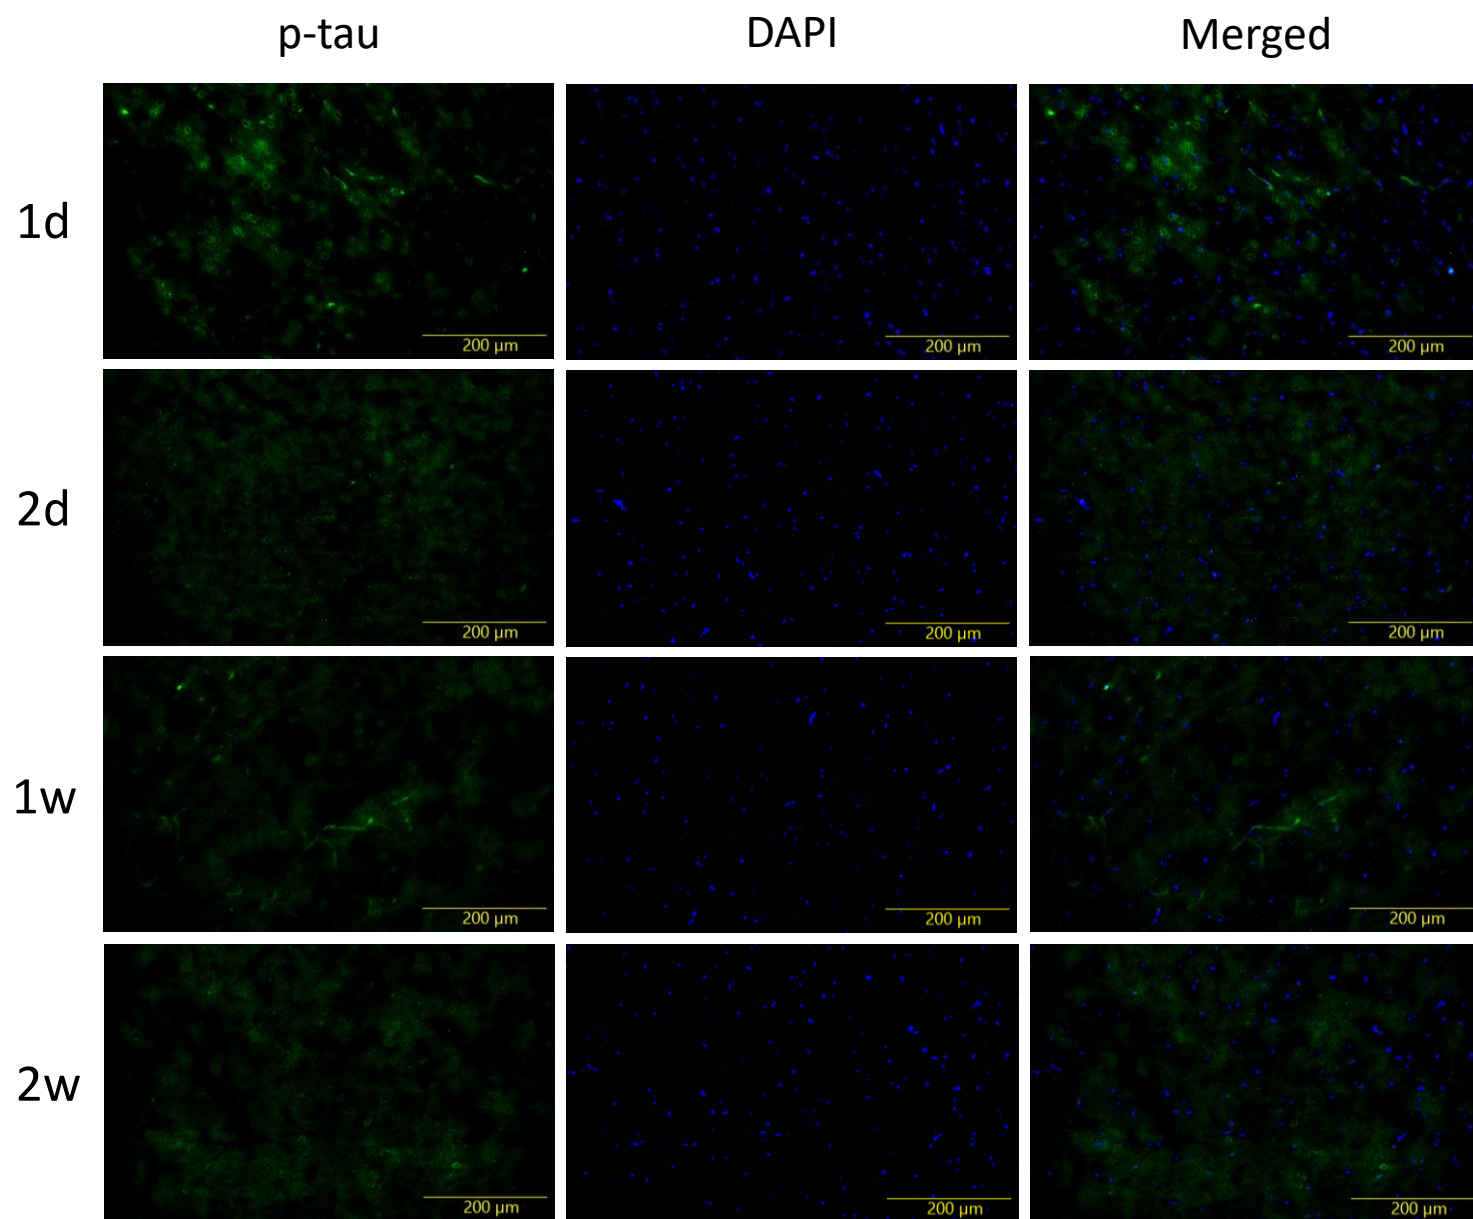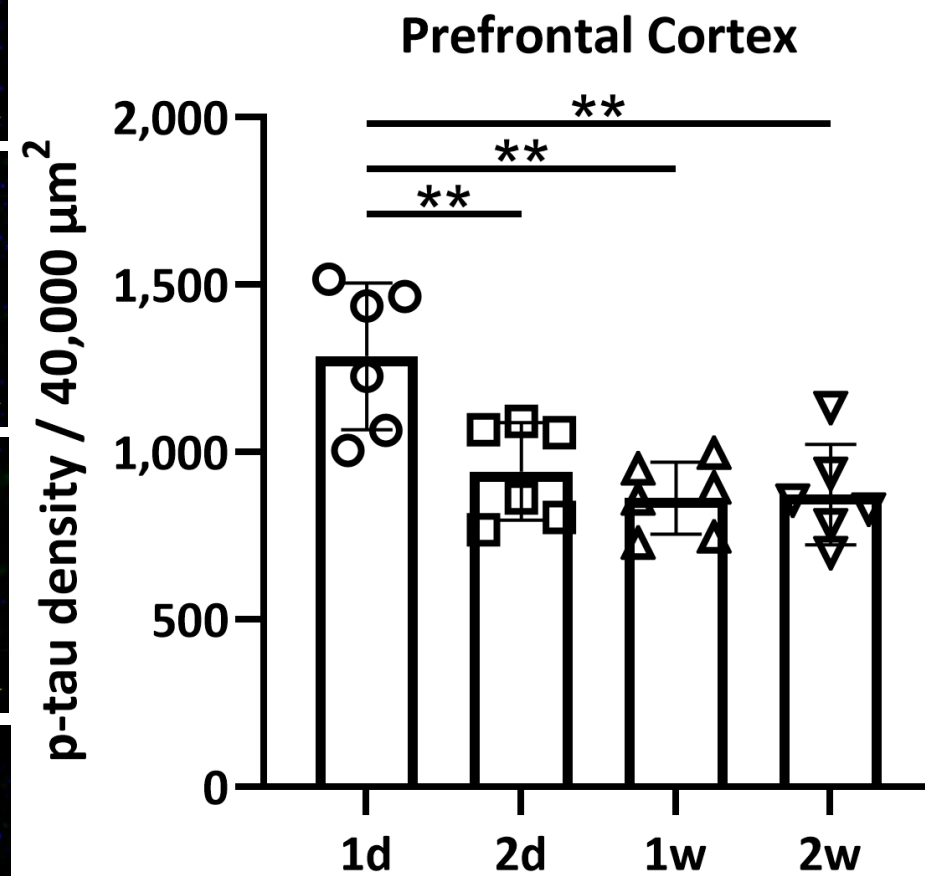

Supplementary Figure S10

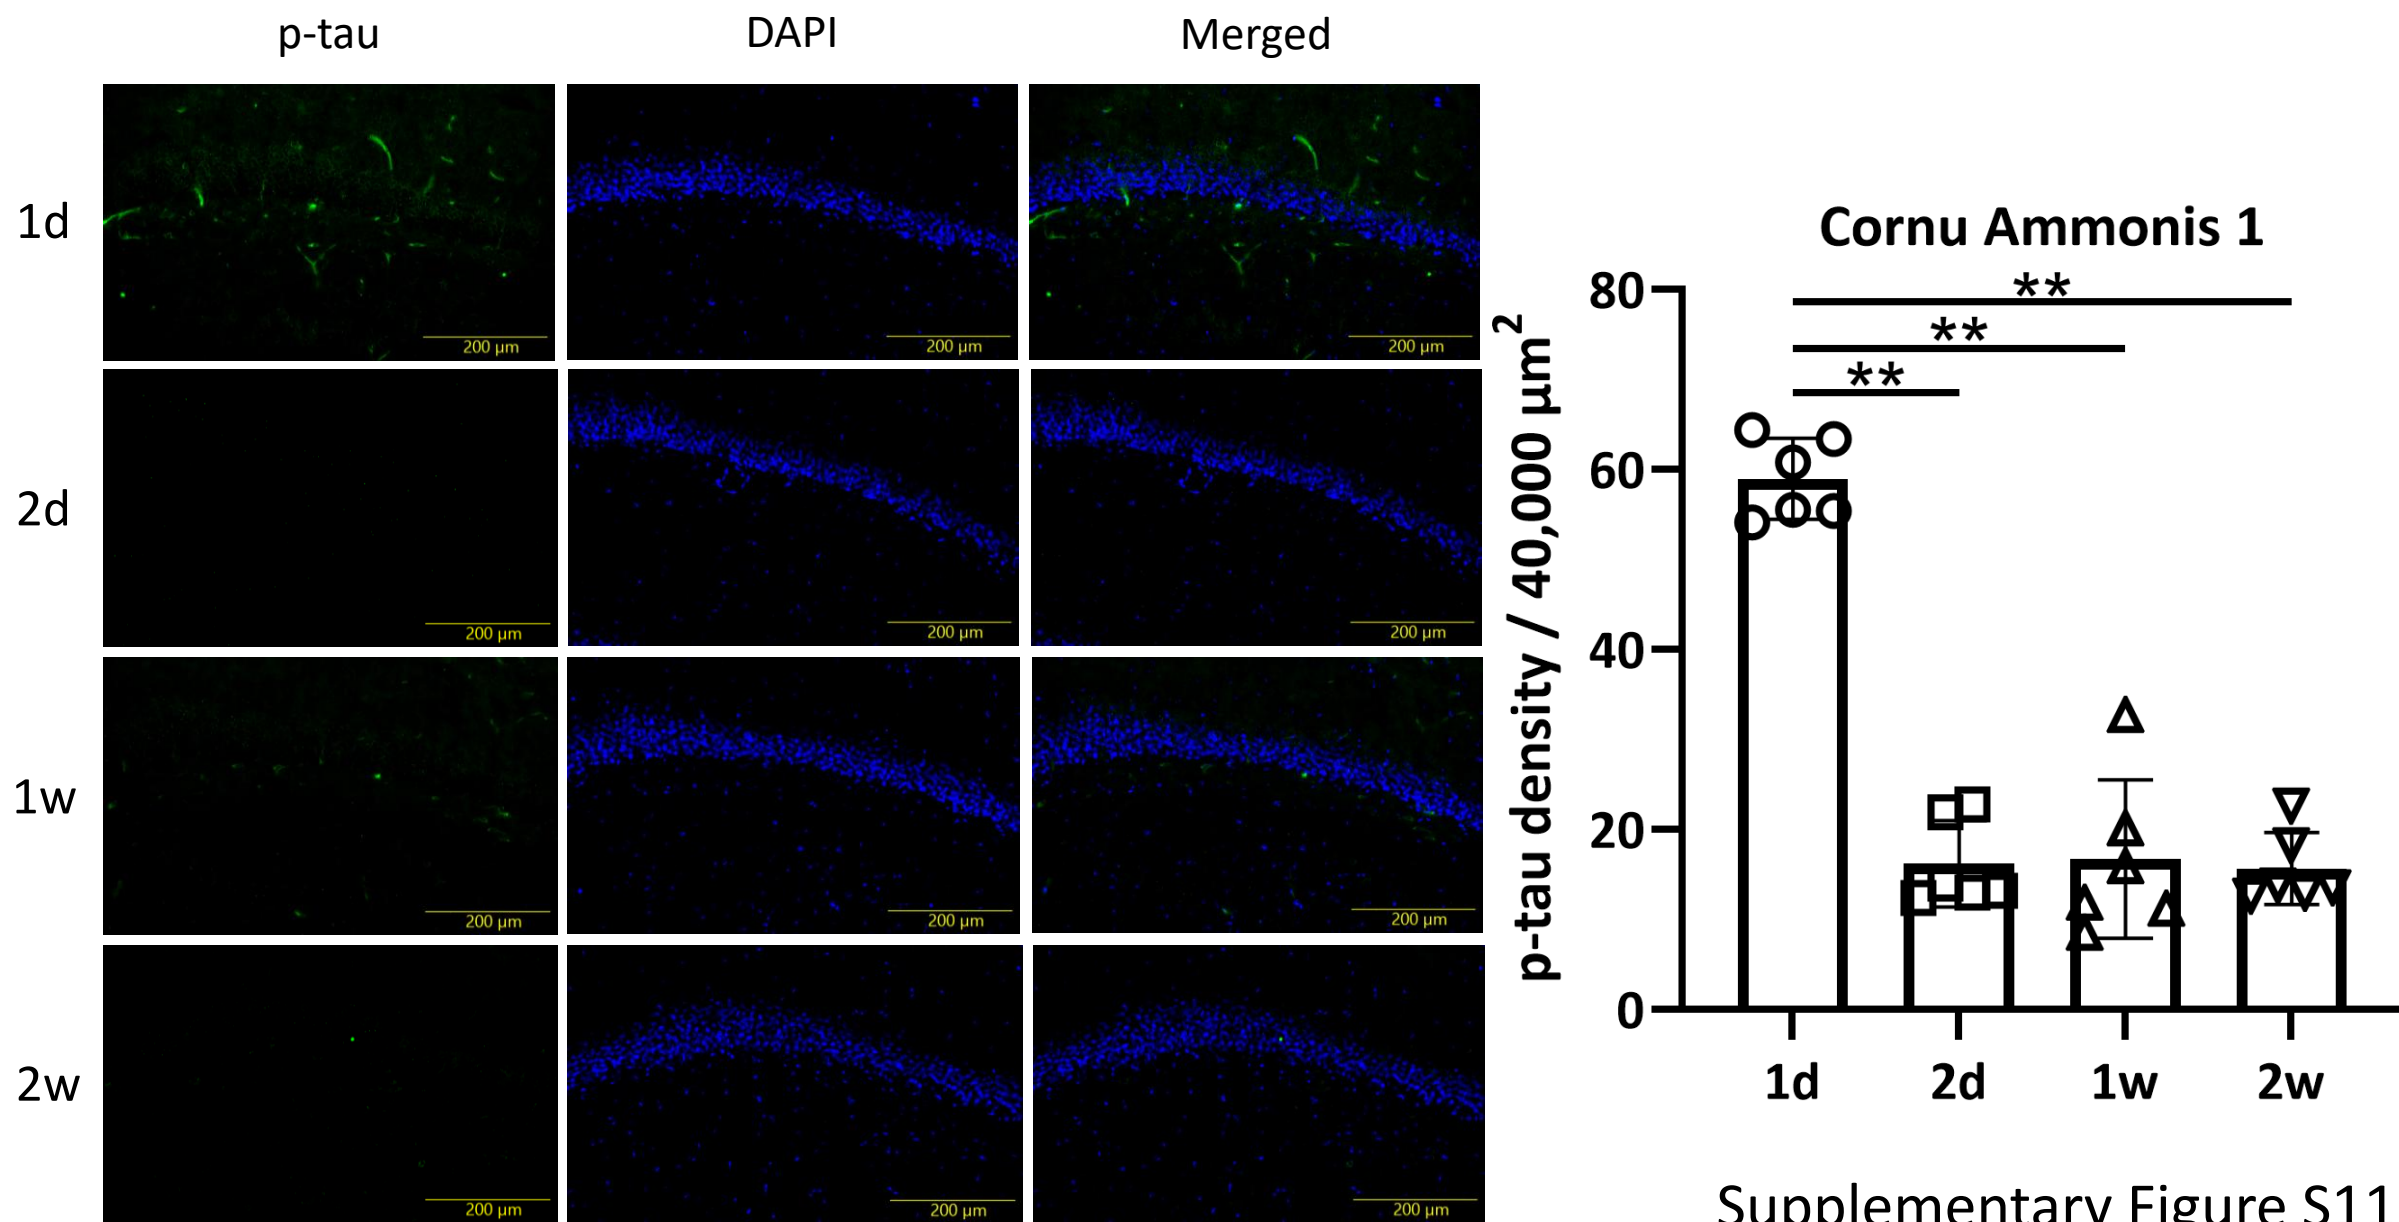

Supplementary Figure S11
